# Supplementary material for: Adherence to Dietary Guidelines in Adults by Diabetes Status: Results From the 2012 Mexican National Health and Nutrition Survey
Source: PubMed Central journal article supplement (PMC7697878; doi:10.3390/nu12113464), 2020-11-12
Supplement: nutrients-12-03464-s001.pdf [file nutrients-12-03464-s001.pdf]

## Supplementary Material

**Table S1.** Sex-stratified unadjusted Mexican Alternate Healthy Eating Index Score and components in Mexican adults by diabetes status ( $n=2762$ )<sup>a</sup>.

| Variables                  | N   | Men            |            |                      |            |                          |         | Women           |            |                      |            |                          |         |
|----------------------------|-----|----------------|------------|----------------------|------------|--------------------------|---------|-----------------|------------|----------------------|------------|--------------------------|---------|
|                            |     | Diabetes<br>82 |            | Non-Diabetes<br>1060 |            | Diff diab<br>vs non-diab | p-value | Diabetes<br>159 |            | Non-Diabetes<br>1461 |            | Diff diab<br>vs non-diab | p-value |
| Total scores               | 100 | Mean           | 95% CI     | Mean                 | 95% CI     |                          |         |                 |            | Mean                 | 95% CI     |                          |         |
|                            |     | 48.0           | 45.5, 50.4 | 44.4                 | 44.0, 45.4 | 3.6                      | 0.011   | 46.6            | 45.4, 47.8 | 45.1                 | 44.3, 45.8 | 1.5                      | 0.034   |
| Component scores           |     |                |            |                      |            |                          |         |                 |            |                      |            |                          |         |
| Higher intake recommended  |     |                |            |                      |            |                          |         |                 |            |                      |            |                          |         |
| Vegetables                 | 9   | 6.4            | 5.4, 7.4   | 6.2                  | 5.9, 6.5   | 0.2                      | 0.748   | 5.6             | 5, 6.2     | 6.2                  | 6, 6.4     | -0.6                     | 0.068   |
| Whole fruit                | 9   | 4.2            | 3.3, 5.1   | 2.9                  | 2.6, 3.1   | 1.3                      | 0.005   | 2.7             | 2.2, 3.1   | 3.3                  | 3.1, 3.5   | -0.6                     | 0.009   |
| Fiber from cereals         | 9   | 2.3            | 1.8, 2.8   | 2.2                  | 2, 2.3     | 0.1                      | 0.640   | 1.7             | 1.3, 2.1   | 2.0                  | 1.9, 2.1   | -0.3                     | 0.124   |
| Nuts                       | 5   | 0.3            | 0.1, 0.4   | 0.2                  | 0.2, 0.3   | 0.1                      | 0.833   | 0.2             | 0.1, 0.2   | 0.2                  | 0.1, 0.2   | 0.0                      | 0.641   |
| Legumes                    | 5   | 3.7            | 3.2, 4.1   | 3.5                  | 3.3, 3.6   | 0.2                      | 0.397   | 3.2             | 2.8, 3.7   | 3.1                  | 3, 3.3     | 0.1                      | 0.713   |
| EPA+DHA                    | 9   | 3.1            | 2.5, 3.8   | 2.9                  | 2.7, 3.1   | 0.2                      | 0.499   | 1.7             | 1.3, 2.1   | 2.6                  | 2.4, 2.7   | -0.9                     | 0.000   |
| Polyunsaturated Fats       | 9   | 5.9            | 5.2, 6.6   | 5.6                  | 5.4, 5.8   | 0.3                      | 0.505   | 5.3             | 4.7, 5.8   | 5.7                  | 5.5, 5.9   | -0.4                     | 0.159   |
| Limited intake recommended |     |                |            |                      |            |                          |         |                 |            |                      |            |                          |         |
| SSBs                       | 9   | 4.3            | 3.2, 5.4   | 3.1                  | 2.8, 3.8   | 1.2                      | 0.010   | 6.2             | 5.4, 6.9   | 4.3                  | 4, 4.6     | 1.9                      | 0.000   |
| Red/processed meat         | 9   | 4.3            | 3.8, 4.9   | 4.0                  | 3.7, 4.3   | 0.3                      | 0.347   | 5.6             | 5, 6.3     | 4.7                  | 4.5, 5     | 0.9                      | 0.010   |
| Sodium                     | 9   | 3.2            | 2.1, 4.3   | 3.2                  | 2.8, 3.6   | 0.0                      | 0.979   | 5.4             | 4.5, 6.3   | 4.0                  | 3.6, 4.3   | 1.4                      | 0.004   |
| Trans Fats                 | 9   | 9.0            | 9, 9       | 9.0                  | 9, 9       | 0.0                      | 0.383   | 9.0             | 9, 9       | 9.0                  | 9, 9       | 0.0                      | 0.677   |
| Alcohol                    | 9   | 1.34           | 0.43, 2.25 | 1.56                 | 1.26, 1.85 | -0.22                    | 0.657   | 0.03            | -0.03, 0.1 | 0.01                 | 0.01, 0.02 | 0.02                     | 0.536   |

<sup>a</sup>Sex-specific multivariable linear regression models were used to predict dietary scores according to diabetes status. Estimates were weighted to adjust for unequal probability of sampling and to be nationally representative. CI—confidence intervals; DHA—docosahexaenoic acid; EPA—eicosapentaenoic acid; SSBs—sugar-sweetened beverages.

**Table S2.** Sex-stratified unadjusted intakes of micronutrients in Mexican adults by diabetes status ( $n=2762$ )<sup>a</sup>.

| Variables                                         | N     | Men            |        |                     |        |                          |         | Women           |       |                     |        |                          |         |
|---------------------------------------------------|-------|----------------|--------|---------------------|--------|--------------------------|---------|-----------------|-------|---------------------|--------|--------------------------|---------|
|                                                   |       | Diabetes<br>82 |        | No Diabetes<br>1060 |        | Diff diab<br>vs non-diab | p-value | Diabetes<br>159 |       | No Diabetes<br>1461 |        | Diff diab<br>vs non-diab | p-value |
|                                                   |       | Mean           | 95% CI | Mean                | 95% CI |                          |         |                 |       | Mean                | 95% CI |                          |         |
| Micronutrients (intake per day)                   |       |                |        |                     |        |                          |         |                 |       |                     |        |                          |         |
| Vitamin A (RAE) ( $\mu\text{g}/1000\text{kcal}$ ) | 359.2 | 328.2, 390.3   | 312.7  | 294.7, 330.6        | 46.5   | 0.011                    | 441.8   | 386.6, 497      | 402.0 | 384.6, 419.3        | 39.8   | 0.179                    |         |
| Vitamin D* ( $\mu\text{g}/1000\text{kcal}$ )      | 2.5   | 1.8, 3.1       | 1.7    | 1.6, 1.8            | 0.8    | 0.037                    | 2.2     | 1.8, 2.6        | 1.9   | 1.8, 2              | 0.3    | 0.165                    |         |
| Vitamin E (mg/1000kcal)                           | 3.5   | 3, 3.9         | 3.1    | 3, 3.1              | 0.4    | 0.093                    | 3.3     | 3.1, 3.5        | 3.4   | 3.3, 3.5            | -0.1   | 0.159                    |         |
| Folate ( $\mu\text{g}/1000\text{kcal}$ )          | 169.4 | 157.5, 181.3   | 147.9  | 142.7, 153          | 21.5   | 0.001                    | 185.9   | 169.7, 202      | 177.7 | 171.9, 183.5        | 8.2    | 0.343                    |         |

|                            |        |                |        |                |       |       |        |                |        |                |       |       |
|----------------------------|--------|----------------|--------|----------------|-------|-------|--------|----------------|--------|----------------|-------|-------|
| Vitamin C (mg/1000kcal)    | 94.2   | 76.6, 111.9    | 78.2   | 72.5, 83.9     | 16.0  | 0.094 | 93.3   | 80.9, 105.8    | 101.6  | 95.3, 107.9    | -8.3  | 0.246 |
| Vitamin B-6 (mg/1000kcal)  | 1.0    | 0.9, 1         | 0.9    | 0.9, 0.9       | 0.1   | 0.012 | 1.3    | 0.7, 1.9       | 1.0    | 0.9, 1.1       | 0.3   | 0.275 |
| Vitamin B-12 (µg/1000kcal) | 2.6    | 2.2, 3         | 2.1    | 1.9, 2.2       | 0.5   | 0.009 | 2.5    | 2.2, 2.7       | 2.2    | 2.1, 2.3       | 0.3   | 0.096 |
| Calcium (mg/1000kcal)      | 510.1  | 469.9, 550.4   | 422.5  | 412, 433       | 87.6  | 0.000 | 554.6  | 511.2, 598     | 471.1  | 460.2, 482     | 83.5  | 0.000 |
| Magnesium (mg/1000kcal)    | 208.1  | 193.1, 223     | 186.8  | 182.7, 190.9   | 21.3  | 0.008 | 226.9  | 213.1, 240.8   | 197.9  | 194.2, 201.6   | 29.0  | 0.000 |
| Zinc (mg/1000kcal)         | 5.4    | 5.1, 5.6       | 4.9    | 4.9, 5         | 0.5   | 0.003 | 5.5    | 5.3, 5.7       | 5.1    | 5, 5.2         | 0.4   | 0.001 |
| Potassium (mg/1000kcal)    | 1487.1 | 1372.8, 1601.4 | 1206.7 | 1173.2, 1240.2 | 280.4 | 0.000 | 1472.5 | 1373.8, 1571.2 | 1371.6 | 1341.3, 1401.9 | 100.9 | 0.049 |
| Sodium (mg/1000kcal)       | 1144.0 | 1057.4, 1230.6 | 1077.1 | 1044.1, 1110.2 | 66.9  | 0.157 | 1116.7 | 1019.6, 1213.8 | 1143.2 | 1115.6, 1170.8 | -26.5 | 0.617 |

aSex-specific multivariable linear regression models were used to predict macronutrient intakes according to diabetes status. Estimates were weighted to adjust for unequal probability of sampling and to be nationally representative. \*  $p$ -value < 0.05. CI—confidence intervals; RAE—retinol activity equivalents.

**Table S3.** Sex-stratified unadjusted intakes of macronutrients in Mexican adults by diabetes status ( $n=2762$ )<sup>a</sup>.

| Variables                                | Men            |              |                      |              |                          |            | Women           |              |                      |              |                          |            |
|------------------------------------------|----------------|--------------|----------------------|--------------|--------------------------|------------|-----------------|--------------|----------------------|--------------|--------------------------|------------|
|                                          | Diabetes<br>82 |              | Non-Diabetes<br>1060 |              | Diff diab<br>vs non-diab | $p$ -value | Diabetes<br>159 |              | Non-Diabetes<br>1461 |              | Diff diab<br>vs non-diab | $p$ -value |
| $N$                                      | Mean           | 95% CI       | Mean                 | 95% CI       |                          |            | Mean            | 95% CI       | Mean                 | 95% CI       |                          |            |
| Macronutrients (intake per day)          |                |              |                      |              |                          |            |                 |              |                      |              |                          |            |
| Total protein (g/1000kcal)               | 34.4           | 33, 35.8     | 30.7                 | 30.1, 31.4   | 3.7                      | 0.000      | 33.7            | 32.3, 35.1   | 31.9                 | 31.4, 32.4   | 1.8                      | 0.019      |
| Total carbohydrates (g/1000kcal)         | 135.7          | 129.9, 141.5 | 143.6                | 141.3, 145.9 | -7.9                     | 0.012      | 147.4           | 141.4, 153.3 | 149.2                | 147.5, 150.8 | -1.8                     | 0.564      |
| Fiber (g/1000 kcal)                      | 13.6           | 12.6, 14.6   | 12.9                 | 12.6, 13.3   | 0.7                      | 0.190      | 14.7            | 13.8, 15.6   | 14.2                 | 13.9, 14.5   | 0.5                      | 0.294      |
| Total sugars (g/1000kcal)                | 53.5           | 48.4, 58.7   | 55.5                 | 53.6, 57.3   | -2.0                     | 0.490      | 53.2            | 48.7, 57.7   | 60.1                 | 58.3, 61.9   | -6.9                     | 0.008      |
| Added sugars (g/1000kcal)                | 24.2           | 20.8, 27.7   | 34.7                 | 33, 36.5     | -10.5                    | 0.000      | 23.7            | 19.4, 28.1   | 34.1                 | 32.1, 36     | -10.4                    | 0.000      |
| Total fatty acids (g/1000kcal)           | 35.2           | 32.9, 37.6   | 31.8                 | 31.1, 32.5   | 3.4                      | 0.006      | 32.7            | 30.9, 34.4   | 32.8                 | 32.3, 33.3   | -0.1                     | 0.897      |
| Saturated fatty acids (g/1000kcal)       | 13.7           | 12.2, 15.2   | 11.4                 | 11.1, 11.7   | 2.3                      | 0.004      | 12.5            | 11.5, 13.6   | 12.1                 | 11.8, 12.3   | 0.4                      | 0.403      |
| Monounsaturated fatty acids (g/1000kcal) | 12.3           | 11.1, 13.6   | 11.0                 | 10.7, 11.2   | 1.3                      | 0.040      | 10.4            | 9.6, 11.1    | 11.0                 | 10.8, 11.2   | -0.6                     | 0.105      |
| Polyunsaturated fatty acids (g/1000kcal) | 7.9            | 7.1, 8.6     | 7.6                  | 7.4, 7.8     | 0.3                      | 0.553      | 7.5             | 6.9, 8.1     | 7.9                  | 7.7, 8.1     | -0.4                     | 0.199      |
| Transfat (g/1000kcal)                    | 0.3            | 0.2, 0.3     | 0.2                  | 0.2, 0.2     | 0.1                      | 0.191      | 0.3             | 0.2, 0.3     | 0.3                  | 0.2, 0.3     | 0.0                      | 0.789      |
| Omega-3 (g/1000kcal)                     | 0.05           | 0.04, 0.06   | 0.05                 | 0.04, 0.06   | 0.00                     | 0.424      | 0.04            | 0.03, 0.06   | 0.05                 | 0.04, 0.06   | -0.01                    | 0.610      |

aSex-specific multivariable linear regression models were used to predict macronutrient intakes according to diabetes status. Estimates were weighted to adjust for unequal probability of sampling and to be nationally representative. CI—confidence intervals.
